# Supplementary material for: Synthesis, structure, and magnetism of a novel series of trinuclear nickel(ii) clusters
Source: Royal Society of Chemistry journal article supplement (doi:10.1039/d2ce00846g), 2022-01-01
Supplement: d2ce00846g1.pdf [file d2ce00846g1.pdf]

## Supporting Information

### Synthesis, structure and magnetism of a novel series of trinuclear nickel(II) clusters

Rong Luo<sup>a</sup>, Cun-Gang Xu<sup>a</sup>, Jia-Ping Tong<sup>b</sup>, Hai-Yan Shi<sup>c</sup>, Xiang-Jian Kong<sup>c</sup>, Yu-Hua Fan<sup>a\*</sup>, Feng Shao<sup>a\*</sup>

- a. Key Laboratory of Marine Chemistry Theory and Technology, Ministry of Education, College of Chemistry and Chemical Engineering, Ocean University of China, Qingdao 266100, China
- b. Lab of Chemical Materials and Devices, Training Base of Army Logistics University of PLA, Chongqing 400041, China
- c. State Key Laboratory of Physical Chemistry of Solid Surfaces, College of Chemistry and Chemical Engineering, Xiamen University, Xiamen 361005, China

**Table S1.** Selected bond lengths (Å) and angles (°) parameters for **1**.

| Selected bond lengths                 |          |                                       |          |
|---------------------------------------|----------|---------------------------------------|----------|
| Ni2—O4                                | 2.038(5) | Ni1—O1                                | 1.860(5) |
| Ni2—O3                                | 2.051(5) | Ni1—O2                                | 1.817(5) |
| Ni2—N3                                | 2.004(6) | Ni1—N2                                | 1.832(6) |
| Ni2—N6                                | 2.038(6) | Ni1—N1                                | 1.930(6) |
| Ni2—N4                                | 2.134(7) | Ni4—O7                                | 2.041(5) |
| Ni2—N5                                | 2.129(7) | Ni4—O7 <sup>i</sup>                   | 2.041(5) |
| Ni3—O5                                | 1.874(6) | Ni4—N11                               | 2.044(6) |
| Ni3—O6                                | 1.828(6) | Ni4—N11 <sup>i</sup>                  | 2.044(6) |
| Ni3—N7                                | 1.817(6) | Ni4—N9 <sup>i</sup>                   | 2.139(8) |
| Ni3—N8                                | 1.940(7) | Ni4—N9                                | 2.139(8) |
| Ni5—O9                                | 1.856(5) | Ni5—N10                               | 1.824(6) |
| Ni5—O8                                | 1.822(6) | Ni5—N12                               | 1.938(6) |
| Selected bond angle                   |          |                                       |          |
| O3—Ni2—N4                             | 89.9(2)  | O7 <sup>i</sup> —Ni4—N11              | 101.0(2) |
| O3—Ni2—N5                             | 88.9(2)  | O7—Ni4—N11 <sup>i</sup>               | 101.0(2) |
| O4—Ni2—O3                             | 176.7(2) | O7 <sup>i</sup> —Ni4—N9 <sup>i</sup>  | 91.6(2)  |
| O4—Ni2—N6                             | 79.0(2)  | O7—Ni4—N9 <sup>i</sup>                | 88.4(2)  |
| O4—Ni2—N4                             | 91.3(2)  | O7 <sup>i</sup> —Ni4—N9               | 88.4(2)  |
| O4—Ni2—N5                             | 90.1(2)  | O7—Ni4—N9                             | 91.6(2)  |
| N3—Ni2—O3                             | 79.6(2)  | N11—Ni4—N11 <sup>i</sup>              | 180.0    |
| N3—Ni2—O4                             | 97.2(2)  | N11—Ni4—N9                            | 89.8(3)  |
| N3—Ni2—N6                             | 176.2(3) | N11 <sup>i</sup> —Ni4—N9              | 90.2(3)  |
| N3—Ni2—N4                             | 91.4(3)  | N11 <sup>i</sup> —Ni4—N9 <sup>i</sup> | 89.8(3)  |
| N3—Ni2—N5                             | 90.9(2)  | N11—Ni4—N9 <sup>i</sup>               | 90.2(3)  |
| N6—Ni2—O3                             | 104.1(2) | N9 <sup>i</sup> —Ni4—N9               | 180.0(4) |
| N6—Ni2—N4                             | 88.1(3)  | O9—Ni5—N12                            | 91.3(3)  |
| N6—Ni2—N5                             | 89.8(2)  | O8—Ni5—O9                             | 178.0(3) |
| N5—Ni2—N4                             | 177.1(3) | O8—Ni5—N10                            | 93.8(2)  |
| O2—Ni1—O1                             | 179.2(2) | O8—Ni5—N12                            | 90.1(3)  |
| O2—Ni1—N2                             | 94.7(2)  | N10—Ni5—O9                            | 84.7(2)  |
| O2—Ni1—N1                             | 90.2(3)  | N10—Ni5—N12                           | 176.0(3) |
| O1—Ni1—N1                             | 90.5(3)  | O5—Ni3—N8                             | 91.6(3)  |
| N2—Ni1—O1                             | 84.6(2)  | O6—Ni3—O5                             | 177.0(3) |
| N2—Ni1—N1                             | 174.8(3) | O6—Ni3—N8                             | 89.8(3)  |
| O7 <sup>i</sup> —Ni4—O7               | 180.0    | N7—Ni3—O5                             | 83.8(3)  |
| O7 <sup>i</sup> —Ni4—N11 <sup>i</sup> | 79.0(2)  | N7—Ni3—O6                             | 94.9(3)  |
| O7—Ni4—N11                            | 79.0(2)  | N7—Ni3—N8                             | 175.1(3) |

Symmetry code: (i) -x+1, -y+1, -z+1.

**Table S2.** Selected bond lengths (Å) and angles (°) parameters for **2**.

| Selected bond lengths                  |            |                                        |            |
|----------------------------------------|------------|----------------------------------------|------------|
| Ni1—O1                                 | 1.857(4)   | Ni2—N4                                 | 2.117(4)   |
| Ni1—N2                                 | 1.825(4)   | Ni2—N4 <sup>ii</sup>                   | 2.117(4)   |
| Ni1—O2                                 | 1.814(4)   | Ni2—O3                                 | 2.030(3)   |
| Ni1—N1                                 | 1.915(5)   | Ni2—O3 <sup>ii</sup>                   | 2.030(3)   |
| Ni1—O1                                 | 1.857(4)   | Ni2—N3                                 | 2.050(4)   |
| Ni1—N2                                 | 1.825(4)   | Ni3—O5                                 | 1.867(3)   |
| Ni1—O2                                 | 1.814(4)   | Ni3—O4                                 | 1.814(3)   |
| Ni1—N1                                 | 1.915(5)   | Ni3—N7                                 | 1.827(4)   |
| Ni1—O1                                 | 1.857(4)   | Ni3—N6                                 | 1.929(4)   |
| Ni1—N2                                 | 1.825(4)   | Ni4—O6                                 | 2.049(3)   |
| Ni1—O2                                 | 1.814(4)   | Ni4—O6 <sup>i</sup>                    | 2.049(3)   |
| Ni2—O3                                 | 2.030(3)   | Ni4—N8 <sup>i</sup>                    | 2.046(4)   |
| Ni2—O3 <sup>ii</sup>                   | 2.030(3)   | Ni4—N8                                 | 2.046(4)   |
| Ni2—N3                                 | 2.050(4)   | Ni4—N9                                 | 2.109(4)   |
| Ni2—N3 <sup>ii</sup>                   | 2.050(4)   | Ni4—N9 <sup>i</sup>                    | 2.109(4)   |
| Selected bond angles                   |            |                                        |            |
| O6 <sup>i</sup> —Ni4—O6                | 180.00(17) | O3—Ni2—N4                              | 90.44(14)  |
| O6—Ni4—N9 <sup>i</sup>                 | 90.28(14)  | O3 <sup>ii</sup> —Ni2—N4               | 89.56(14)  |
| O6 <sup>i</sup> —Ni4—N9 <sup>i</sup>   | 89.72(14)  | O3—Ni2—N4 <sup>ii</sup>                | 89.56(14)  |
| O6 <sup>i</sup> —Ni4—N9                | 90.28(14)  | N3 <sup>ii</sup> —Ni2—N3               | 180.00(19) |
| O6—Ni4—N9                              | 89.72(14)  | N3 <sup>ii</sup> —Ni2—N4               | 91.23(16)  |
| N8 <sup>i</sup> —Ni4—O6                | 101.21(14) | N3—Ni2—N4                              | 88.77(16)  |
| N8—Ni4—O6 <sup>i</sup>                 | 101.20(14) | N3 <sup>ii</sup> —Ni2—N4 <sup>ii</sup> | 88.77(16)  |
| N8 <sup>i</sup> —Ni4—O6 <sup>i</sup>   | 78.79(14)  | N3—Ni2—N4 <sup>ii</sup>                | 91.23(16)  |
| N8—Ni4—O6                              | 78.80(14)  | N4—Ni2—N4 <sup>ii</sup>                | 180.0(2)   |
| N8—Ni4—N8 <sup>i</sup>                 | 180.0      | O5—Ni3—N6                              | 91.76(16)  |
| N8—Ni4—N9                              | 89.96(16)  | O4—Ni3—O5                              | 177.12(17) |
| N8—Ni4—N9 <sup>i</sup>                 | 90.04(16)  | O4—Ni3—N7                              | 94.65(16)  |
| N8 <sup>i</sup> —Ni4—N9                | 90.04(16)  | O4—Ni3—N6                              | 89.59(17)  |
| N8 <sup>i</sup> —Ni4—N9 <sup>i</sup>   | 89.96(16)  | N7—Ni3—O5                              | 84.17(15)  |
| N9—Ni4—N9 <sup>i</sup>                 | 180.0(2)   | N7—Ni3—N6                              | 174.28(17) |
| O3—Ni2—O3 <sup>ii</sup>                | 180.0      | O1—Ni1—N1                              | 92.4(2)    |
| O3—Ni2—N3 <sup>ii</sup>                | 100.52(15) | N2—Ni1—O1                              | 84.51(17)  |
| O3 <sup>ii</sup> —Ni2—N3 <sup>ii</sup> | 79.48(15)  | N2—Ni1—N1                              | 175.2(2)   |
| O3—Ni2—N3                              | 79.48(15)  | O2—Ni1—O1                              | 176.98(18) |
| O3 <sup>ii</sup> —Ni2—N3               | 100.52(15) | O2—Ni1—N2                              | 94.7(2)    |
| O3 <sup>ii</sup> —Ni2—N4 <sup>ii</sup> | 90.44(14)  | O2—Ni1—N1                              | 88.5(2)    |

Symmetry code: (i) -x, -y+2, -z+2; (ii) -x+1, -y+2, -z+1.

**TableS3.** Selected bond lengths (Å) and angles (°) parameters for **3**.

| Selected bond lengths                  |            |                                      |            |
|----------------------------------------|------------|--------------------------------------|------------|
| Ni1—O2                                 | 1.821(4)   | Ni4—O4 <sup>i</sup>                  | 2.038(3)   |
| Ni1—O1                                 | 1.855(4)   | Ni4—O4                               | 2.038(3)   |
| Ni1—N3                                 | 1.828(4)   | Ni4—N7 <sup>i</sup>                  | 2.038(4)   |
| Ni1—N4                                 | 1.940(4)   | Ni4—N7                               | 2.038(4)   |
| Ni2—O3                                 | 2.039(3)   | Ni4—N8 <sup>i</sup>                  | 2.112(4)   |
| Ni2—O3 <sup>ii</sup>                   | 2.039(3)   | Ni4—N8                               | 2.112(4)   |
| Ni2—N2                                 | 2.042(4)   | Ni3—O6                               | 1.859(4)   |
| Ni2—N2 <sup>ii</sup>                   | 2.042(4)   | Ni3—O5                               | 1.817(4)   |
| Ni2—N1 <sup>ii</sup>                   | 2.117(5)   | Ni3—N6                               | 1.833(4)   |
| Ni2—N1                                 | 2.117(5)   | Ni3—N5                               | 1.921(4)   |
| Selected bond angle                    |            |                                      |            |
| O2—Ni1—O1                              | 176.91(17) | O4—Ni4—O4 <sup>i</sup>               | 180.0      |
| O2—Ni1—N3                              | 94.52(17)  | O4—Ni4—N8                            | 89.61(14)  |
| O2—Ni1—N4                              | 90.47(17)  | O4 <sup>i</sup> —Ni4—N8              | 90.39(14)  |
| O1—Ni1—N4                              | 90.89(17)  | O4 <sup>i</sup> —Ni4—N8 <sup>i</sup> | 89.61(14)  |
| N3—Ni1—O1                              | 84.30(17)  | O4—Ni4—N8 <sup>i</sup>               | 90.39(14)  |
| N3—Ni1—N4                              | 173.9(2)   | N7—Ni4—O4 <sup>i</sup>               | 100.49(14) |
| O3 <sup>ii</sup> —Ni2—O3               | 180.0      | N7 <sup>i</sup> —Ni4—O4              | 100.49(14) |
| O3—Ni2—N2 <sup>ii</sup>                | 100.65(15) | N7 <sup>i</sup> —Ni4—O4 <sup>i</sup> | 79.51(14)  |
| O3—Ni2—N2                              | 79.35(15)  | N7—Ni4—O4                            | 79.51(14)  |
| O3 <sup>ii</sup> —Ni2—N2 <sup>ii</sup> | 79.36(15)  | N7—Ni4—N7 <sup>i</sup>               | 180.0      |
| O3 <sup>ii</sup> —Ni2—N2               | 100.65(15) | N7—Ni4—N8 <sup>i</sup>               | 91.05(15)  |
| O3—Ni2—N1 <sup>ii</sup>                | 90.46(16)  | N7 <sup>i</sup> —Ni4—N8 <sup>i</sup> | 88.95(15)  |
| O3 <sup>ii</sup> —Ni2—N1 <sup>ii</sup> | 89.54(16)  | N7—Ni4—N8                            | 88.95(15)  |
| O3 <sup>ii</sup> —Ni2—N1               | 90.46(16)  | N7 <sup>i</sup> —Ni4—N8              | 91.05(15)  |
| O3—Ni2—N1                              | 89.54(16)  | N8—Ni4—N8 <sup>i</sup>               | 180.0      |
| N2—Ni2—N2 <sup>ii</sup>                | 180.00(10) | O6—Ni3—N5                            | 91.51(17)  |
| N2 <sup>ii</sup> —Ni2—N1 <sup>ii</sup> | 86.99(17)  | O5—Ni3—O6                            | 178.71(15) |
| N2—Ni2—N1                              | 87.00(17)  | O5—Ni3—N6                            | 94.18(17)  |
| N2—Ni2—N1 <sup>ii</sup>                | 93.00(17)  | O5—Ni3—N5                            | 89.75(18)  |
| N2 <sup>ii</sup> —Ni2—N1               | 93.01(17)  | N6—Ni3—O6                            | 84.56(16)  |
| N1 <sup>ii</sup> —Ni2—N1               | 180.0      | N6—Ni3—N5                            | 175.65(19) |

Symmetry code: (i)  $-x, -y+2, -z+1$ ; (ii)  $-x+1, -y+2, -z$ .

**TableS4.** Selected bond lengths (Å) and angles (°) parameters for **4**.

| Selected bond lengths                  |            |                                      |            |
|----------------------------------------|------------|--------------------------------------|------------|
| Ni1—O2                                 | 1.826(3)   | Ni3—O7 <sup>i</sup>                  | 2.042(3)   |
| Ni1—O1                                 | 1.846(3)   | Ni3—O7                               | 2.042(3)   |
| Ni1—N6                                 | 1.826(4)   | Ni3—N2                               | 2.036(3)   |
| Ni1—N7                                 | 1.938(4)   | Ni3—N2 <sup>i</sup>                  | 2.036(3)   |
| Ni2—O3                                 | 2.046(3)   | Ni3—N3                               | 2.110(4)   |
| Ni2—O3 <sup>ii</sup>                   | 2.046(3)   | Ni3—N3 <sup>i</sup>                  | 2.110(4)   |
| Ni2—N8 <sup>ii</sup>                   | 2.120(4)   | Ni4—O5                               | 1.861(3)   |
| Ni2—N8                                 | 2.120(4)   | Ni4—O6                               | 1.817(3)   |
| Ni2—N5                                 | 2.030(4)   | Ni4—N1                               | 1.833(3)   |
| Ni2—N5 <sup>ii</sup>                   | 2.030(4)   | Ni4—N4                               | 1.921(4)   |
| Selected bond angle                    |            |                                      |            |
| O2—Ni1—O1                              | 177.62(15) | O7—Ni3—O7 <sup>i</sup>               | 180.0      |
| O2—Ni1—N7                              | 90.81(15)  | O7—Ni3—N3                            | 91.00(13)  |
| O1—Ni1—N7                              | 90.43(15)  | O7 <sup>i</sup> —Ni3—N3              | 89.00(13)  |
| N6—Ni1—O2                              | 94.39(15)  | O7 <sup>i</sup> —Ni3—N3 <sup>i</sup> | 91.00(13)  |
| N6—Ni1—O1                              | 84.49(15)  | O7—Ni3—N3 <sup>i</sup>               | 89.00(13)  |
| N6—Ni1—N7                              | 173.99(17) | N2 <sup>i</sup> —Ni3—O7 <sup>i</sup> | 79.25(13)  |
| O3 <sup>ii</sup> —Ni2—O3               | 180.0      | N2—Ni3—O7                            | 79.25(13)  |
| O3—Ni2—N8 <sup>ii</sup>                | 89.14(14)  | N2—Ni3—O7 <sup>i</sup>               | 100.75(13) |
| O3—Ni2—N8                              | 90.86(14)  | N2 <sup>i</sup> —Ni3—O7              | 100.75(13) |
| O3 <sup>ii</sup> —Ni2—N8               | 89.14(14)  | N2 <sup>i</sup> —Ni3—N2              | 180.0      |
| O3 <sup>ii</sup> —Ni2—N8 <sup>ii</sup> | 90.86(14)  | N2—Ni3—N3 <sup>i</sup>               | 88.90(14)  |
| N8—Ni2—N8 <sup>ii</sup>                | 180.0      | N2 <sup>i</sup> —Ni3—N3 <sup>i</sup> | 91.09(14)  |
| N5—Ni2—O3 <sup>ii</sup>                | 101.08(14) | N2—Ni3—N3                            | 91.10(14)  |
| N5 <sup>ii</sup> —Ni2—O3               | 101.08(14) | N2 <sup>i</sup> —Ni3—N3              | 88.91(14)  |
| N5 <sup>ii</sup> —Ni2—O3 <sup>ii</sup> | 78.92(14)  | N3 <sup>i</sup> —Ni3—N3              | 180.0      |
| N5—Ni2—O3                              | 78.92(14)  | O5—Ni4—N4                            | 91.22(15)  |
| N5 <sup>ii</sup> —Ni2—N8 <sup>ii</sup> | 93.00(15)  | O6—Ni4—O5                            | 179.04(13) |
| N5 <sup>ii</sup> —Ni2—N8               | 87.00(15)  | O6—Ni4—N1                            | 94.61(15)  |
| N5—Ni2—N8 <sup>ii</sup>                | 87.00(15)  | O6—Ni4—N4                            | 89.74(15)  |
| N5—Ni2—N8                              | 93.00(16)  | N1—Ni4—O5                            | 84.43(14)  |
| N5—Ni2—N5 <sup>ii</sup>                | 180.0      | N1—Ni4—N4                            | 175.53(16) |

Symmetry code: (i)  $-x+1, -y+1, -z+1$ ; (ii)  $-x+2, -y, -z+1$ .

**Table S5.** Selected bond lengths(Å)and angles (°) parameters for **5**.

| Selected bond lengths  |            |                                      |            |
|------------------------|------------|--------------------------------------|------------|
| Ni2—O2                 | 2.117(3)   | Ni2—N2                               | 1.959(3)   |
| Ni2—O3                 | 2.117(3)   | Ni1—O1 <sup>i</sup>                  | 1.853(3)   |
| Ni2—O5                 | 2.002(3)   | Ni1—O1                               | 1.853(3)   |
| Ni2—O4                 | 2.138(3)   | Ni1—N1 <sup>i</sup>                  | 1.852(3)   |
| Ni2—N00A               | 1.981(3)   | Ni1—N1                               | 1.852(3)   |
| Selected bond angle    |            |                                      |            |
| O2—Ni2—O3              | 86.71(11)  | N2—Ni2—O2                            | 78.82(12)  |
| O2—Ni2—O4              | 91.63(11)  | N2—Ni2—O3                            | 97.23(12)  |
| O3—Ni2—O4              | 156.69(11) | N2—Ni2—O5                            | 89.32(13)  |
| O5—Ni2—O2              | 168.14(11) | N2—Ni2—O4                            | 105.27(12) |
| O5—Ni2—O3              | 94.56(12)  | N2—Ni2—N00A                          | 173.19(14) |
| O5—Ni2—O4              | 91.80(12)  | O1—Ni1—O1 <sup>i</sup>               | 180.0      |
| N00A—Ni2—O2            | 95.53(12)  | N1—Ni1—O1                            | 84.49(13)  |
| N00A—Ni2—O3            | 78.52(12)  | N1 <sup>i</sup> —Ni1—O1 <sup>i</sup> | 84.49(13)  |
| N00A—Ni2—O5            | 96.28(12)  | N1 <sup>i</sup> —Ni1—O1              | 95.51(13)  |
| N00A—Ni2—O4            | 78.50(12)  | N1—Ni1—O1 <sup>i</sup>               | 95.51(13)  |
| N1—Ni1—N1 <sup>i</sup> | 180.00(14) |                                      |            |

**Table S6.** The continuous shape measures value calculated using SHAPE 2.0.

| Complex | SP-4 ( $D_{4h}$ , Square ) | OC-6 ( $O_h$ , Octahedron) |
|---------|----------------------------|----------------------------|
| 1A–Ni1  | 0.138                      | --                         |
| 1A–Ni2  | --                         | 0.709                      |
| 1A–Ni3  | 0.205                      | --                         |
| 1B–Ni4  | --                         | 0.662                      |
| 1B–Ni5  | 0.144                      | --                         |
| 2A–Ni1  | 0.226                      | --                         |
| 2A–Ni2  | --                         | 0.593                      |
| 2B–Ni3  | 0.228                      | --                         |
| 2B–Ni4  | --                         | 0.646                      |
| 3A–Ni1  | 0.234                      | --                         |
| 3A–Ni2  | --                         | 0.645                      |
| 3B–Ni3  | 0.133                      | --                         |
| 3B–Ni4  | --                         | 0.585                      |
| 4A–Ni1  | 0.202                      | --                         |
| 4A–Ni2  | --                         | 0.695                      |
| 4B–Ni3  | --                         | 0.614                      |
| 4B–Ni4  | 0.131                      | --                         |
| 5–Ni1   | 0.231                      | --                         |
| 5–Ni2   | --                         | 1.841                      |

**Table S7.** Non-bonding interactions geometry (Å, °)

| Complex  | D—H...A                                             | d(D—H) | d(H...A) | d(D...A) | ∠DHA   |
|----------|-----------------------------------------------------|--------|----------|----------|--------|
| <b>1</b> | C <sub>40</sub> —H <sub>40</sub> ...N <sub>7</sub>  | 0.950  | 2.703    | 3.583    | 154.3  |
|          | C <sub>17</sub> —H <sub>17</sub> ...N <sub>10</sub> | 0.950  | 2.600    | 3.515    | 161.8  |
|          | C <sub>20</sub> —H <sub>20</sub> ...C <sub>24</sub> | 0.950  | 2.851    | 3.633    | 140.3  |
|          | C <sub>7</sub> —H <sub>7</sub> ...C <sub>23</sub>   | 0.950  | 2.900    | 3.719    | 145.1  |
| <b>2</b> | C <sub>22</sub> —H <sub>22</sub> ...N <sub>2</sub>  | 0.950  | 2.630    | 3.509    | 154.0  |
|          | C <sub>16</sub> —H <sub>16</sub> ...N <sub>7</sub>  | 0.950  | 2.614    | 3.549    | 168.2  |
|          | C <sub>11</sub> —H <sub>11</sub> ...N <sub>5</sub>  | 0.950  | 2.741    | 3.484    | 135.6  |
|          | C <sub>4</sub> —H <sub>4B</sub> ...C <sub>43</sub>  | 0.980  | 2.791    | 3.296    | 112.73 |
| <b>3</b> | C <sub>24</sub> —H <sub>24</sub> ...N <sub>3</sub>  | 0.950  | 2.583    | 3.501    | 162.6  |
|          | C <sub>19</sub> —H <sub>19</sub> ...N <sub>6</sub>  | 0.950  | 2.723    | 3.617    | 157.2  |
|          | C <sub>39</sub> —H <sub>39</sub> ...O <sub>2</sub>  | 0.950  | 2.584    | 3.522    | 169.53 |
| <b>4</b> | C <sub>45</sub> —H <sub>45</sub> ...N <sub>6</sub>  | 0.950  | 2.652    | 3.567    | 161.8  |
|          | C <sub>27</sub> —H <sub>27</sub> ...O <sub>2</sub>  | 0.950  | 2.490    | 3.397    | 159.7  |
| <b>5</b> | O <sub>3</sub> —H <sub>3</sub> ...O <sub>6</sub>    | 0.883  | 1.743    | 2.597    | 162.2  |
|          | O <sub>6</sub> —H <sub>6A</sub> ...O <sub>5</sub>   | 0.840  | 1.799    | 2.631    | 170.6  |
|          | O <sub>7</sub> —H <sub>7</sub> ...O <sub>2</sub>    | 0.840  | 1.862    | 2.673    | 162.0  |
|          | O <sub>8</sub> —H <sub>8</sub> ...O <sub>7</sub>    | 0.870  | 1.899    | 2.753    | 171.6  |
|          | O <sub>4</sub> —H <sub>4</sub> ...O <sub>8</sub>    | 0.885  | 1.816    | 2.692    | 170.0  |



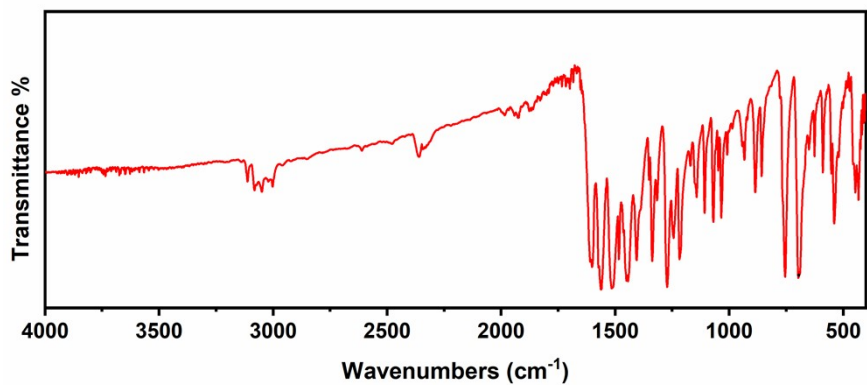

Fig. S1. The IR spectra of **1**.

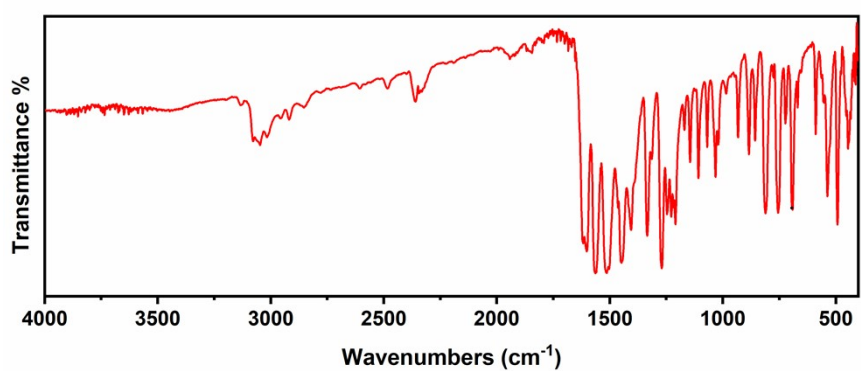

Fig. S2. The IR spectra of **2**.

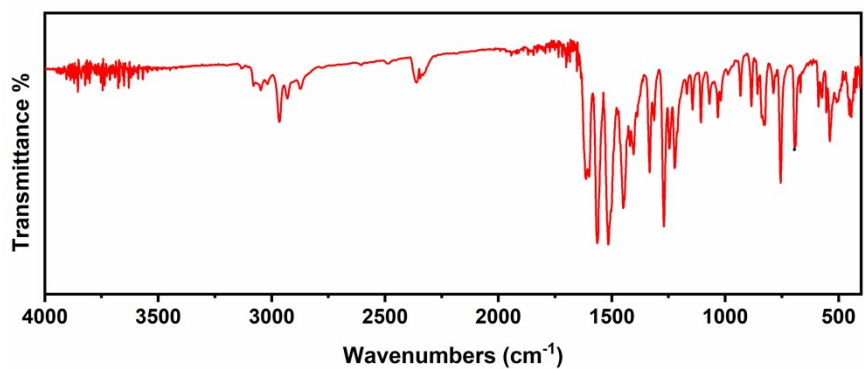

Fig. S3. The IR spectra of **3**.

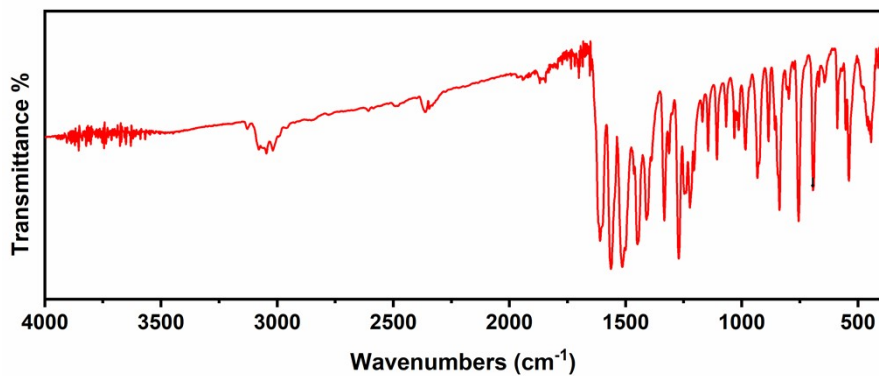

Fig. S4. The IR spectra of **4**.

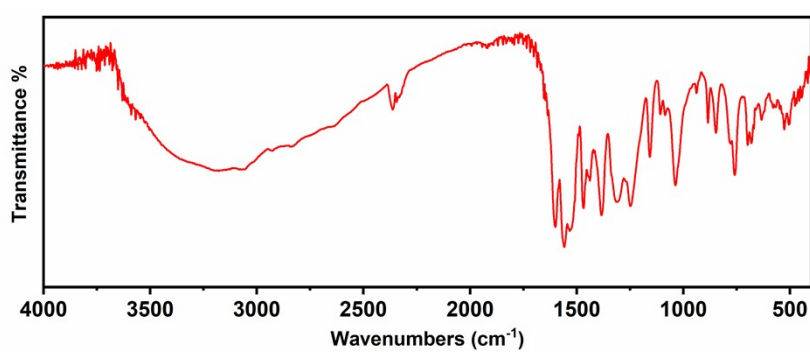

Fig. S5. The IR spectra of **5**.

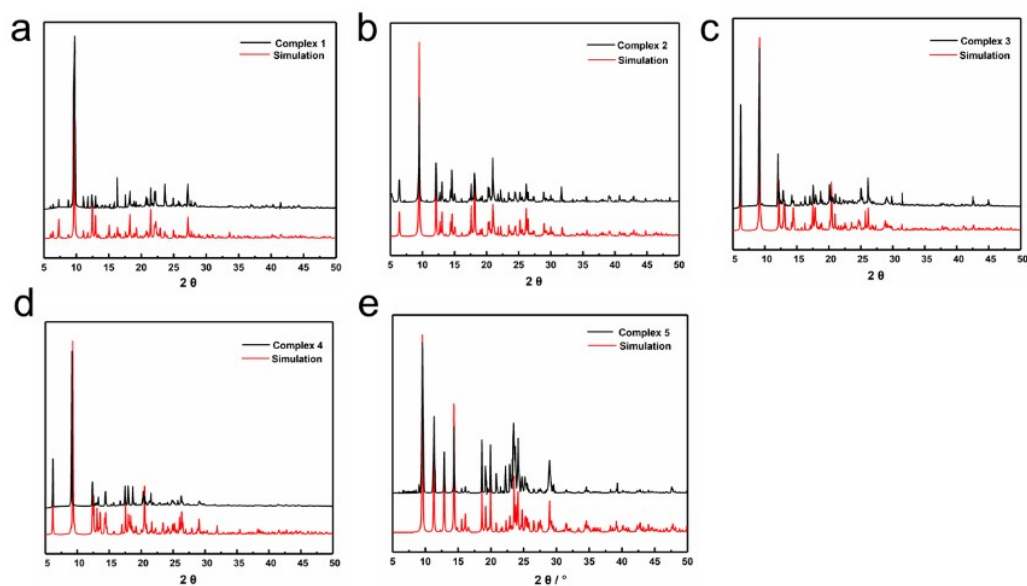

Fig. S6. PXRD patterns of **1** (a), **2** (b), **3** (c), **4** (d) and **5** (e).

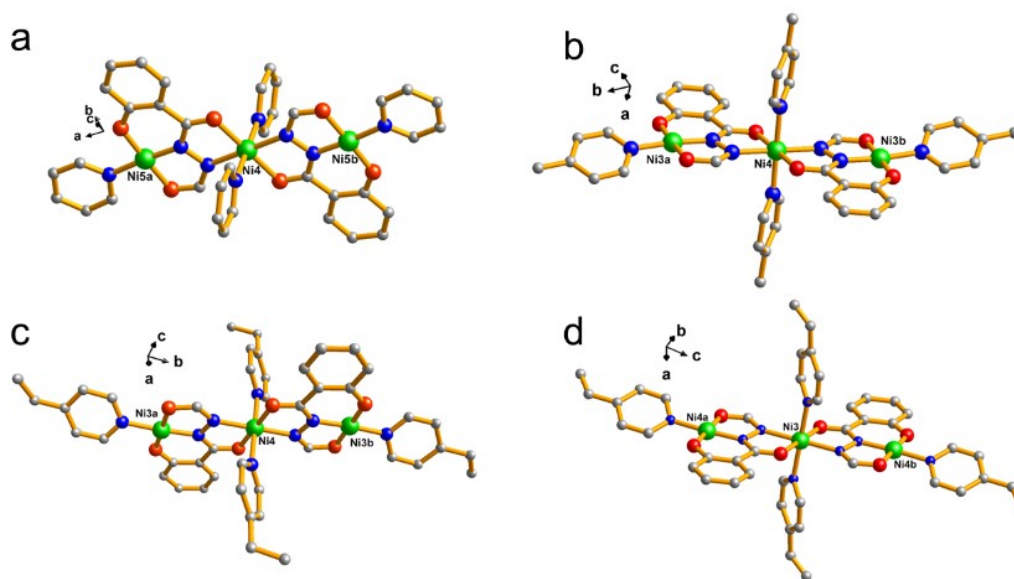

Fig. S7. Coordination environment of Ni(II) ions in **1B** (a), **2B** (b), **3B** (c) and **4B** (d). Hydrogen atoms, counter anions and free solvent molecules were omitted for clarity.

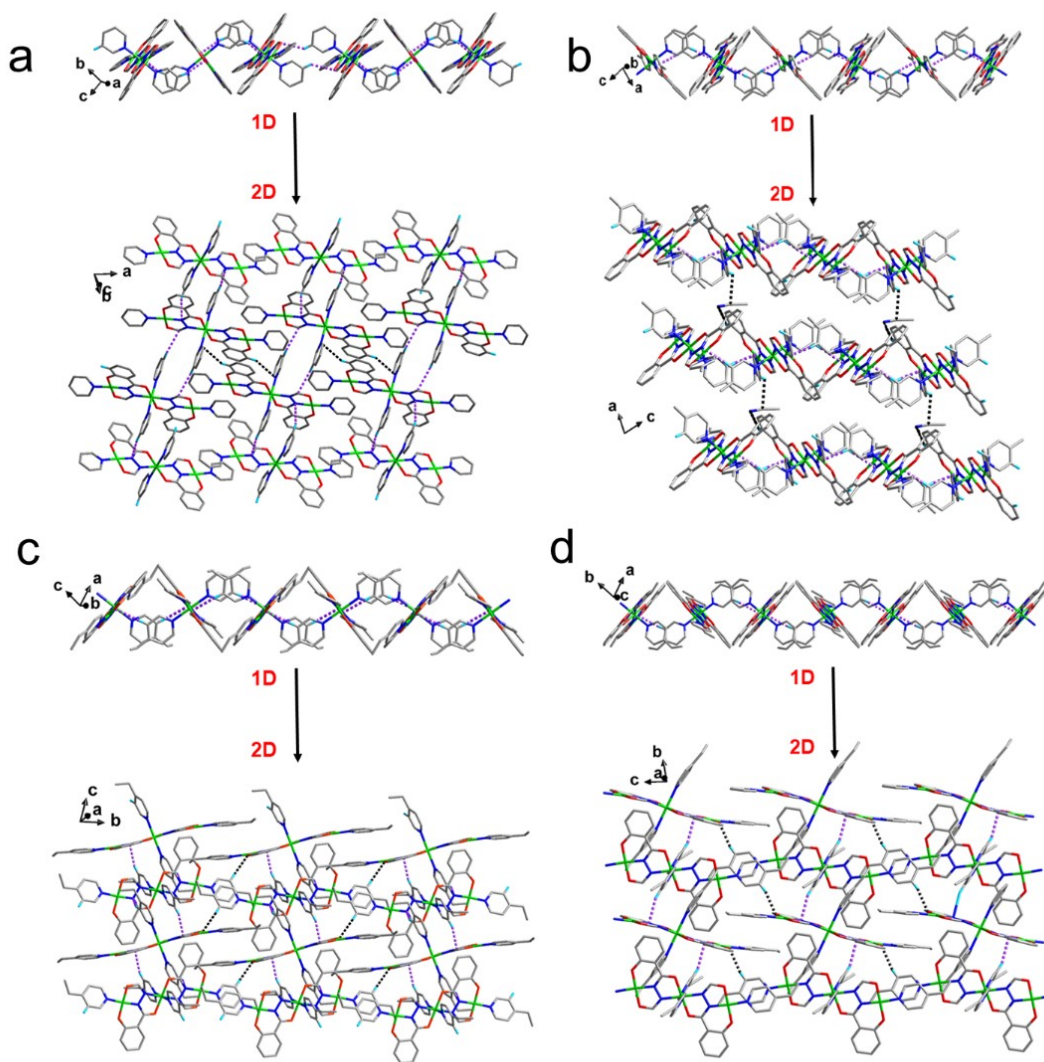

Fig. S8. The 1D chain and 2D layer of 1(a), 2(b), 3(c) and 4(d) viewed along an axis.

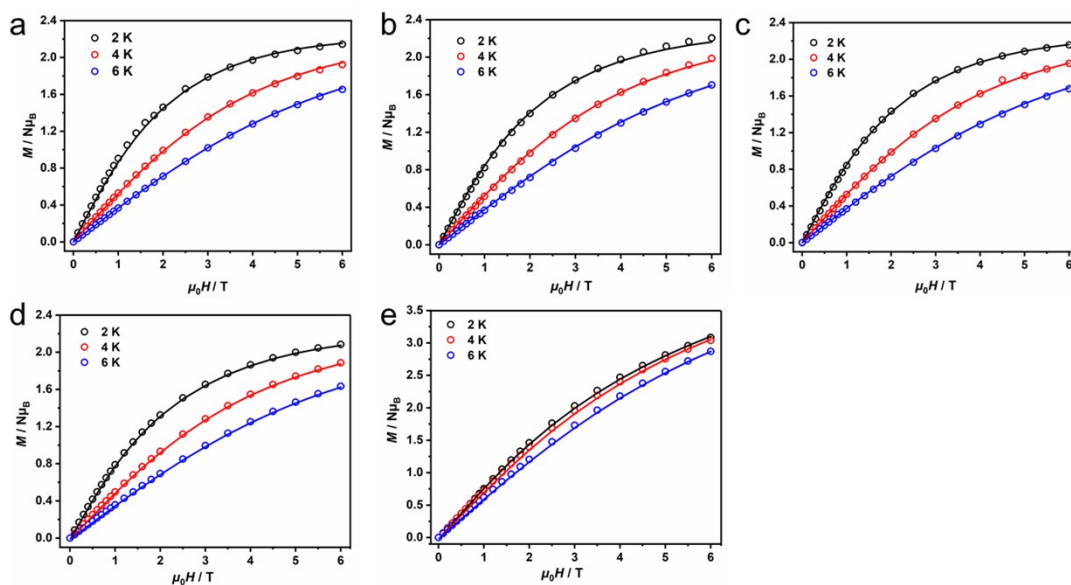

Fig. S9. Field-dependent magnetization at variable temperatures; ( $\circ$ ) represents experimental data. Solid line represents the best fit of the  $\chi_M T$  data by using the PHI program.

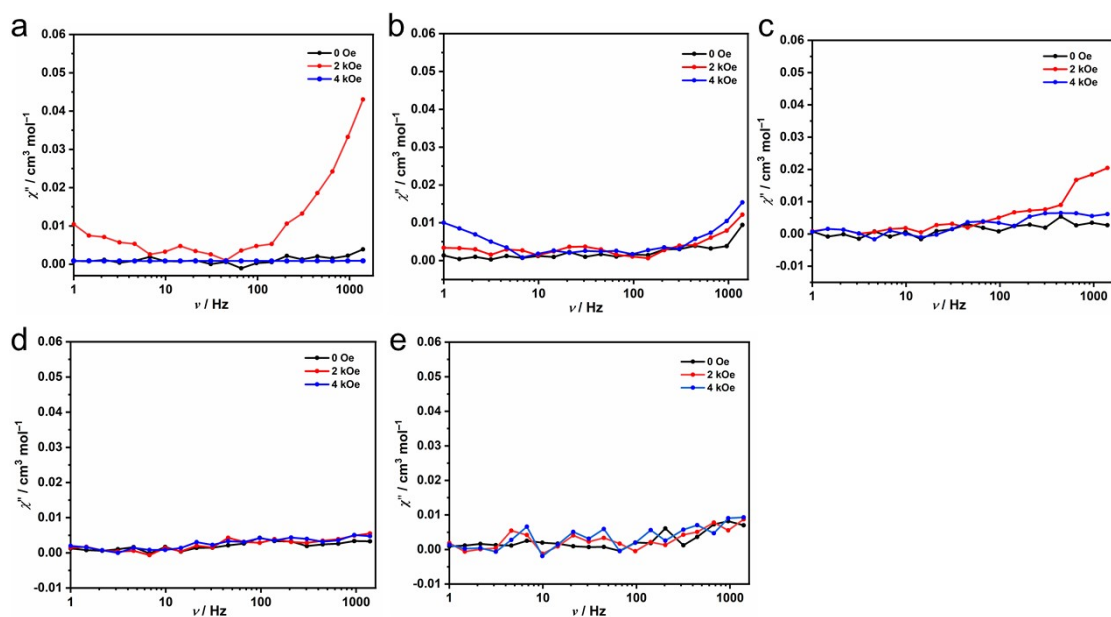

Fig. S10. Frequency dependence of the out-of-phase ( $\chi''$ ) ac susceptibilities measured under zero dc field at 2 K for **1** (a), **2** (b), **3** (c), **4** (d) and **5** (e).
